# Supplementary material for: Sustained-releasing hollow microparticles with dual-anticancer drugs elicit greater shrinkage of tumor spheroids
Source: PubMed Central journal article supplement (PMC5655243; doi:10.18632/oncotarget.20591), 2017-08-24
Supplement: oncotarget-08-80841-s001.pdf [file oncotarget-08-80841-s001.pdf]

# Sustained-releasing hollow microparticles with dual-anticancer drugs elicit greater shrinkage of tumor spheroids

## SUPPLEMENTARY MATERIALS

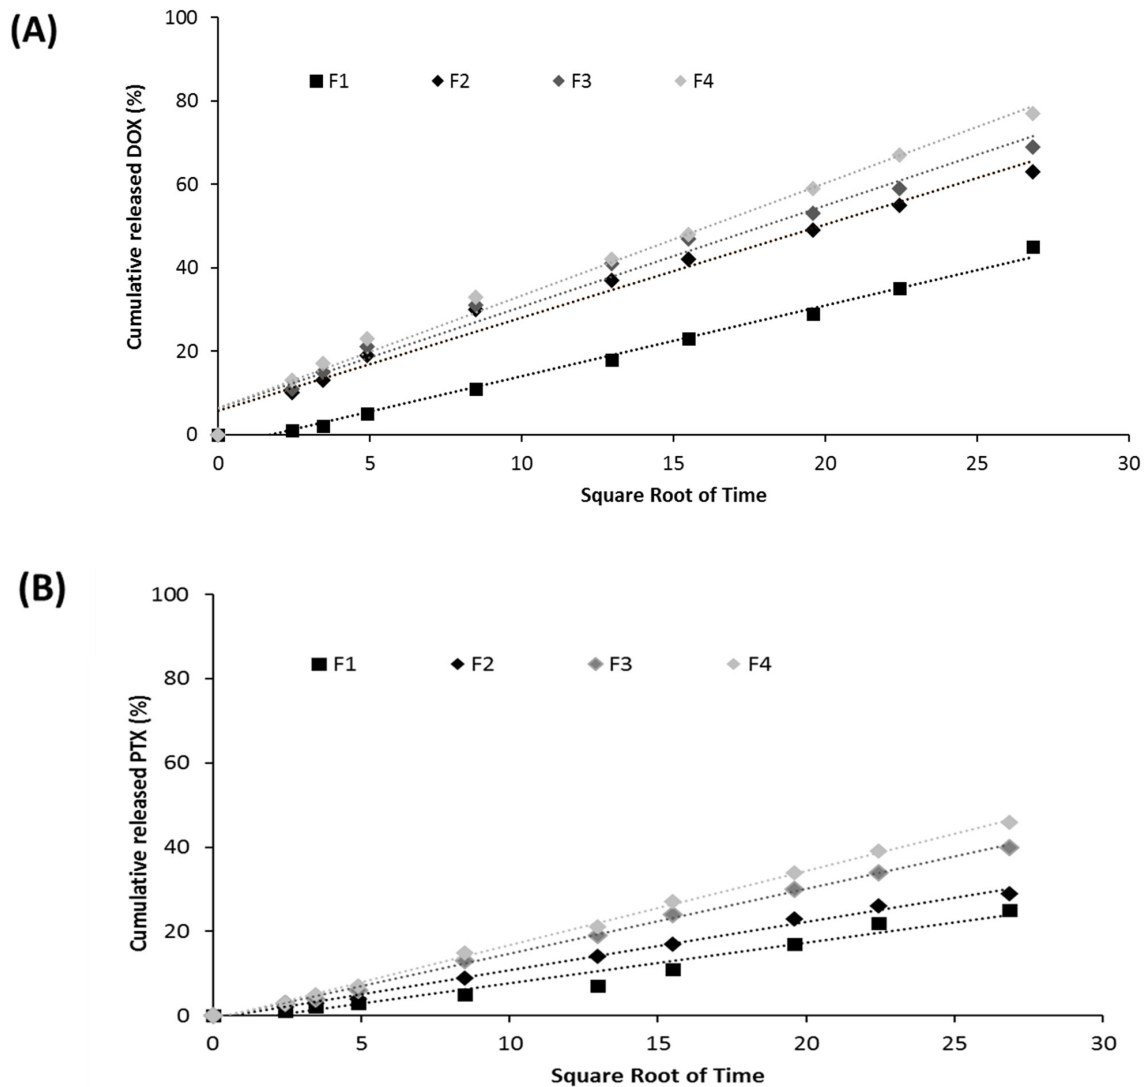

Supplementary Figure 1: *In vitro* release of (A) DOX and (B) PTX from solid (F1) and hollow (F2-F4) microparticles as a function of square root of time (n=3).

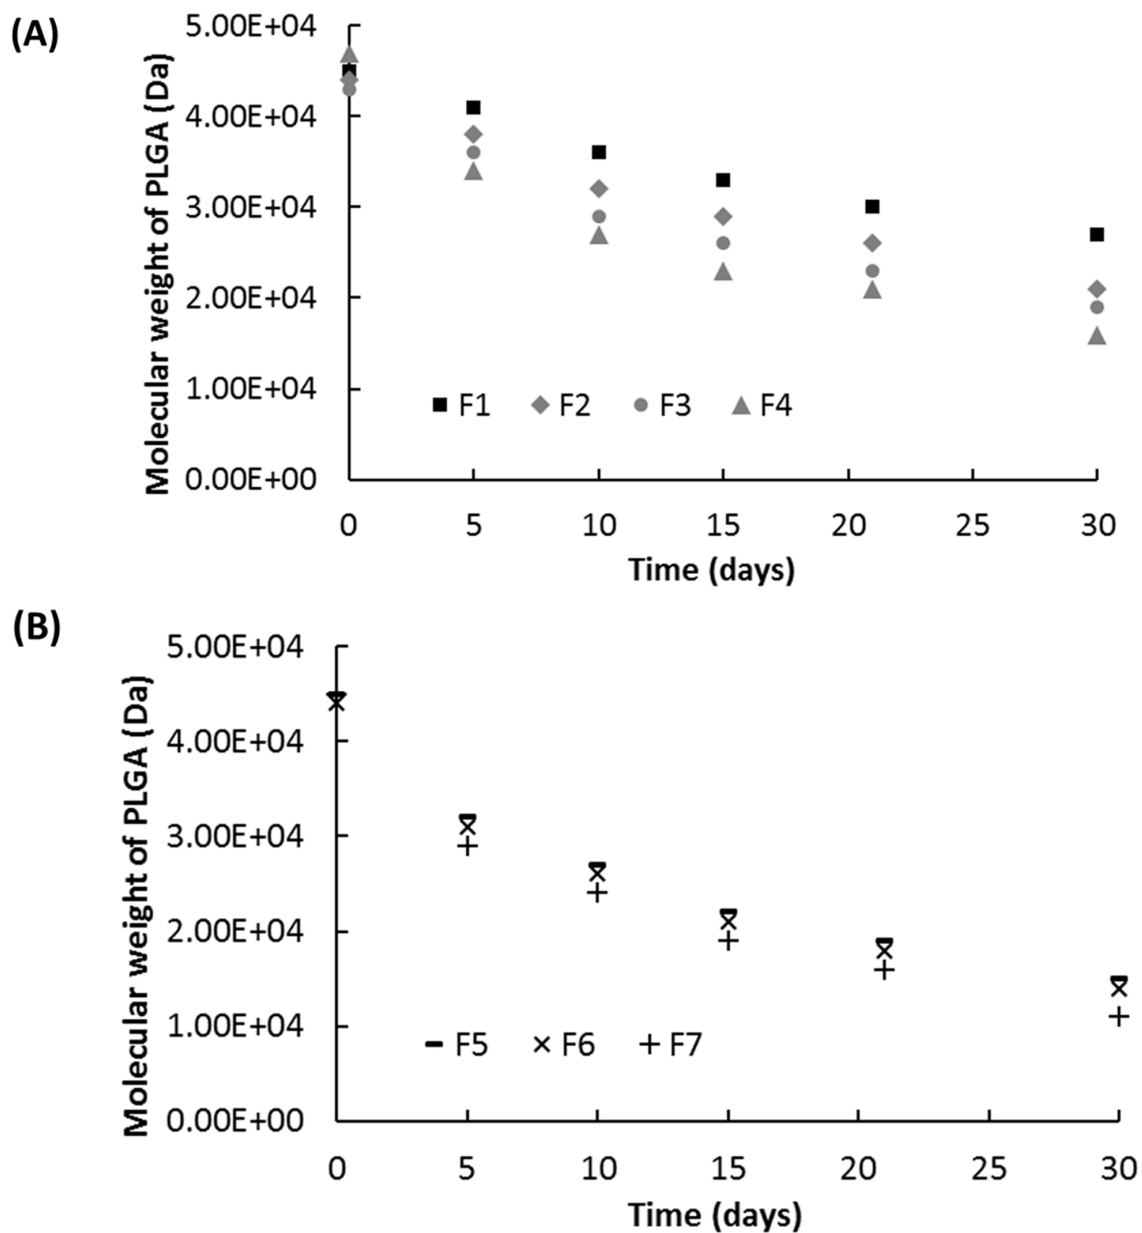

**Supplementary Figure 2:** Average molecular weight of PLGA of the degrading (A) microparticles (F1-F4) and (B) microparticles (F5-F7) over time (n=3).

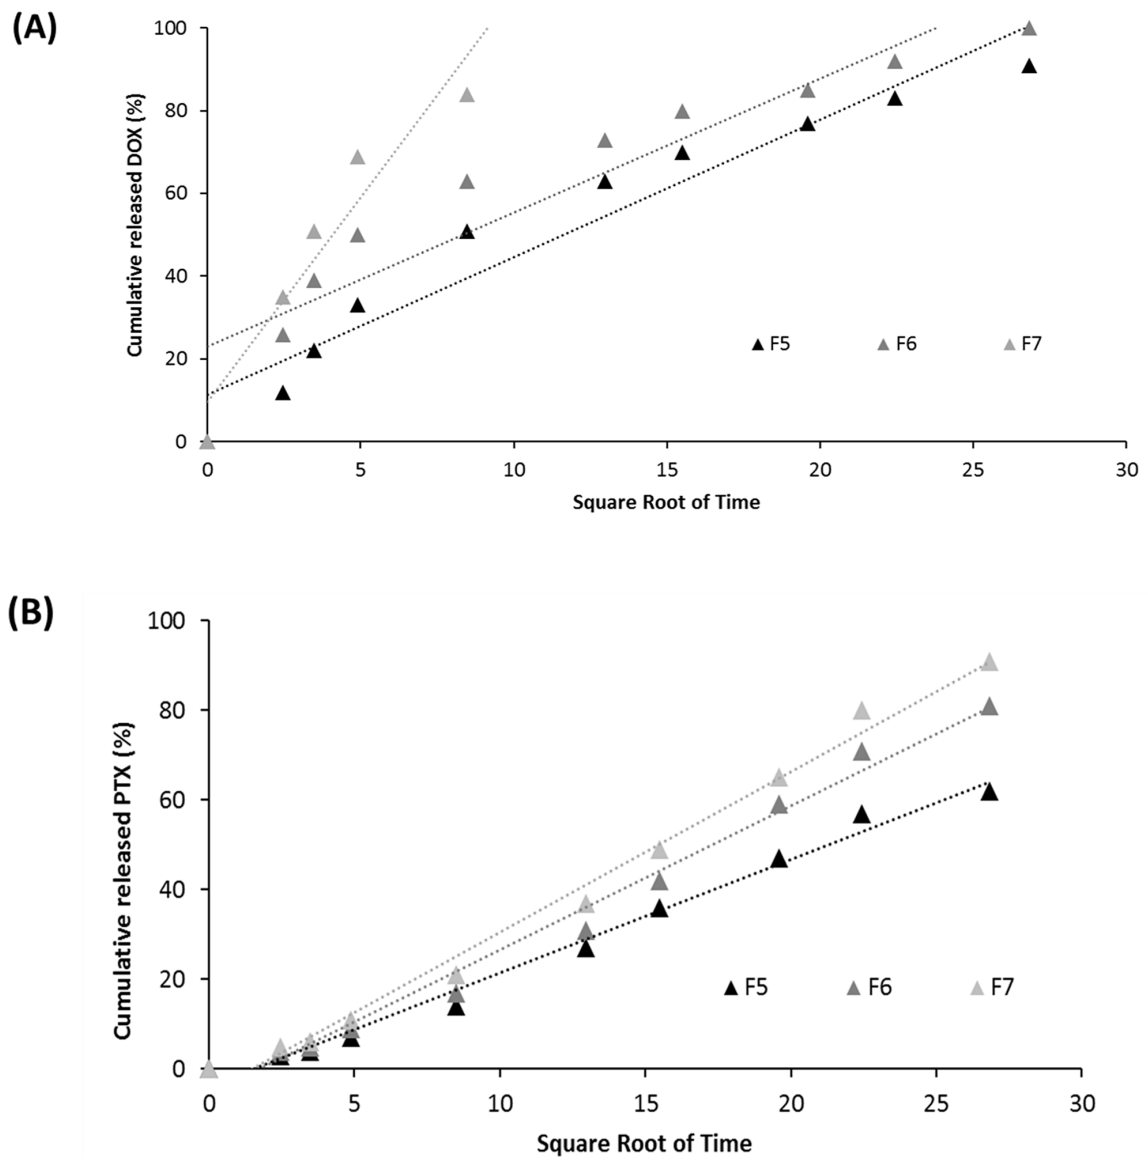

**Supplementary Figure 3:** *In vitro* release of (A) DOX and (B) PTX from MCD-incorporated microparticle (F5-F7) as a function of square root of time (n=3).
